# Supplementary material
Source: ML conference proceedings conference paper supplement (https://openreview.net/forum?id=OruB0mPF1Ef)
Supplement: supplementary_material [file attachment]

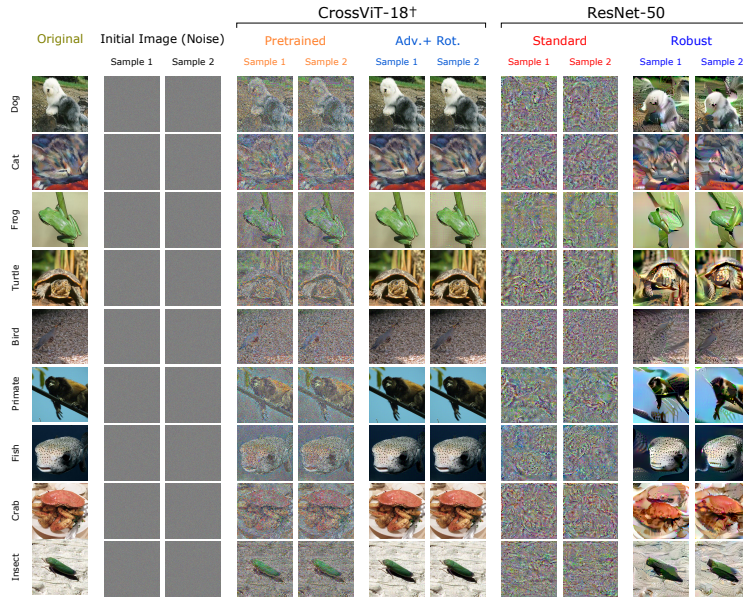

Figure 10: An extended version of Figure 3

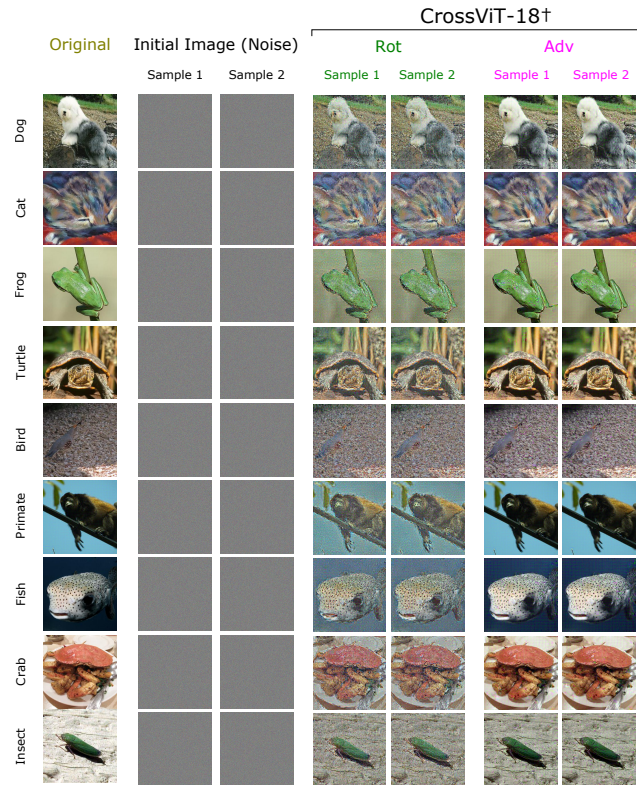

Figure 11: Feature Inversion for CrossViT-18<sup>+</sup> (Adv) & CrossViT-18<sup>+</sup> (Rot).

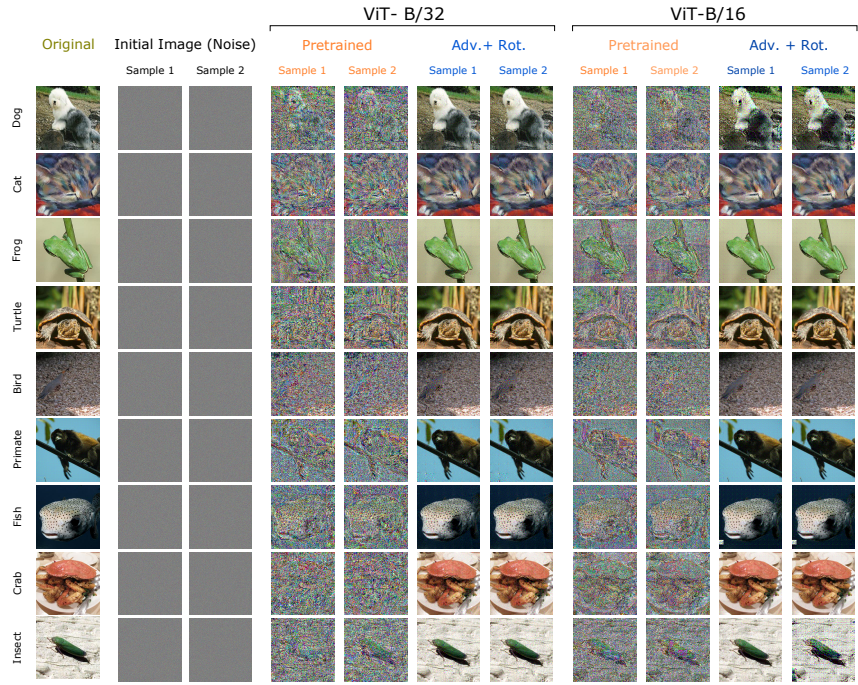

Figure 12: Feature Inversion for Vanilla Vision Transformers ViT-B/32 & ViT-B/16.

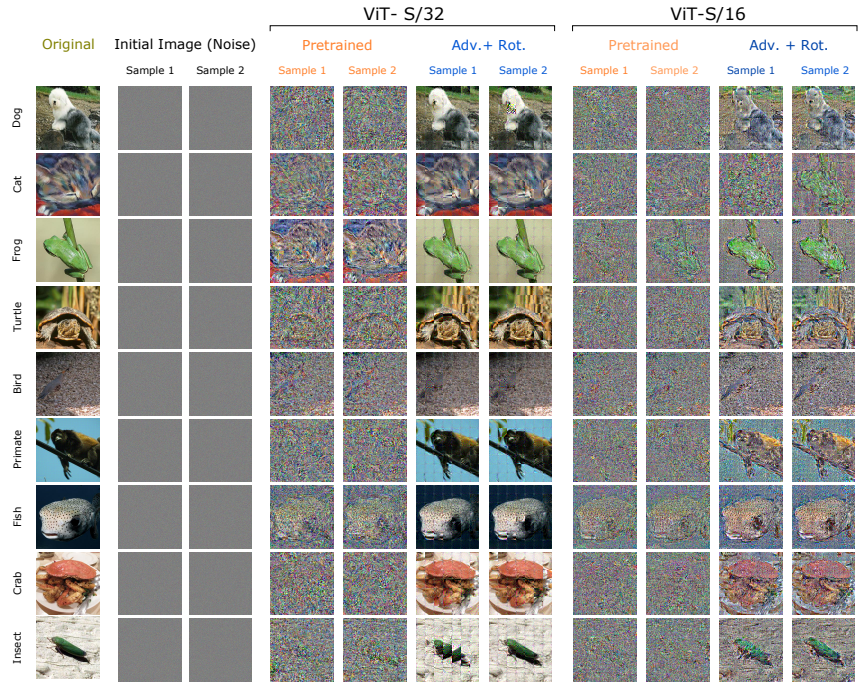

Figure 13: Feature Inversion for Vanilla Vision Transformers ViT-S/32 & ViT-S/16.
